# Supplementary material for: The Effect of Endurance and Endurance-Strength Training on Bone Health and Body Composition in Centrally Obese Women—A Randomised Pilot Trial
Source: MDPI journal article supplement (doi:10.3390/healthcare10050821), 2022-04-28
Supplement: s1 [file s1]

**Table S2.** Scheme of strength exercises.

| Day of the week | Exercise                                                                                                                                                                                                                                                                                                                                                                                                                                                                            | Number of series/repetitions |
|-----------------|-------------------------------------------------------------------------------------------------------------------------------------------------------------------------------------------------------------------------------------------------------------------------------------------------------------------------------------------------------------------------------------------------------------------------------------------------------------------------------------|------------------------------|
| Monday          | <ol style="list-style-type: none"> <li>1. Push the barbell in front of chest upwards while standing.</li> <li>2. One minute recovery break.</li> <li>3. Push the barbell up from behind head in a standing position.</li> <li>4. One minute recovery break.</li> <li>5. Bend elbow joints through their full range of motion while standing.</li> </ol>                                                                                                                             | 3/16*                        |
| Wednesday       | <ol style="list-style-type: none"> <li>1. Kneel straight on a bean type balance ball (across on the bean) – maintaining balance on unstable ground.</li> <li>2. Lie on your stomach on a bean type balance ball (along the bean ball) – maintain body on the ball so that no part of body touches the ground.</li> <li>3. Sit astride on a bean type balance ball so that no part of your body touches the ground.</li> </ol>                                                       | depending on fitness level   |
| Friday          | <ol style="list-style-type: none"> <li>1. Do squats with a barbell on shoulders to the right angle, at a medium pace counted on "3".</li> <li>2. Do squats with a barbell on shoulders to the right angle with varying pace in the following sequence: 1 slow, 1 quick ... 5 slow, 5 quick</li> <li>3. Perform isometric contractions while doing a squat (90° knee bend), with varying duration. The sequence is: 10 s, 15 s, 20 s, 25 s, 30 s, 25 s, 20 s, 15 s, 10 s.</li> </ol> | 6/10<br><br>6/30<br><br>9    |

\*Series interrupted with an approximately. 10-12 s isometric contraction in intermediate position (approx. 90° bend at the elbow joint).
